# Supplementary material for: Dementia Care Quality at Home: A Dementia Care Curriculum for Home-Based Primary Care
Source: Research Square preprint supplement (doi:10.21203/rs.3.rs-8001358/v1), 2025-12-17
Supplement: Supplementary file 1 [file 0b26df77ba787b0b3332dda5.docx]

**Focus Group Questions for Practice Staff** (qualitative assessment of impact of the intervention on the practice and of impact of the facilitators and barriers to implementation)

**INTRODUCTION** (Time :00)

We are so grateful for your participation in the Dementia Care Quality at Home program. We would like to spend some time now talking about your experience with the program.

Please use the raise hand button which is part of the reactions button at bottom of your screen. Feel free to use the chat function if you have a thought you wish to share.  Please try to avoid interrupting fellow participants and avoid giving advice to other participants. Please keep in mind that all said during this focus group should be held in confidence. Please do not share it with others.

We want you to feel comfortable throughout the entire interview. We value your honesty and willingness to share, and we want you to know that you can skip or not participate in any question you would like, or to stop or pause the interview at any point.

May we begin the recording?

**Intro/warm-up.**

We want to first talk about what you think the intervention's impact was on your practice.

1. What do you think the intervention's impact was on your patients?
2. Having now completed the intervention, do you have any reflections on the curriculum of the asynchronous modules and the live training that we did with the team?
3. Was there anything about the intervention that you think would be harmful for patients?
4. Did patients have any complaints?
5. What were the facilitators to implementing this program?
   1. What were things that made it easy to conduct this program?
   2. What made it difficult?

*Probes:*

- - 1. Training
    2. Educational Materials
    3. Checklists
    4. Research team support
    5. Case conferences
    6. Community of implementors/co-creation
    7. Practice stipend
    8. Practice leadership
    9. Growing sense of competency of caring for PWD
    10. Practice organization

1. What were the barriers to implementing this program?
   1. What were things that made it easy to conduct this program?
   2. What made it difficult?

*Probes:*

- - 1. Practice organization
    2. Time
    3. Caregiver responsiveness
  1. Were there any cultural barriers to implementing this program?

1. What would you change in the intervention?
   1. What additions or subtractions should be made?
2. How likely are you to continue this program after the study concludes?
