# Supplementary material for: Dementia Care Quality at Home: A Dementia Care Curriculum for Home-Based Primary Care
Source: Research Square preprint supplement (doi:10.21203/rs.3.rs-8001358/v1), 2025-12-17
Supplement: Supplementary file 2 [file 86057136af3d19b2bbbfb001.docx]

Questions for each section:

Role in practice: MD/MP/RN/CAN/SW/office practice administrator-manager/other

1. ON a scale of 1-10, how much did this session on XXXX help you?
2. Tell us about the level of detail
3. Not enough detail
4. Just enough detail
5. Too detailed
6. Was there anything missing from this presentation?
7. What was your biggest take-away/learning from this presentation?
